# Supplementary material for: Circadian Potency Spectrum with Extended Exposure to Polychromatic White LED Light under Workplace Conditions
Source: PubMed Central journal article supplement — J Biol Rhythms. 2020 Jun 16;35(4):405–15. doi: 10.1177/0748730420923164 (PMC7343335; doi:10.1177/0748730420923164), 2020-06-16
Supplement: Circadan_Potency_Supplementary_Material_March_11_2020.pdf [file Circadan_Potency_Supplementary_Material_March_11_2020.pdf]

**Suppl Table 1.** Corneal (eye level) relative spectral power distributions of the six white LED light sources (A, B, C, D, E, F) and the fluorescent light used in the study

| WAVELENGTH | LIGHT SOURCE NORMALISED RELATIVE IRRADIANCE AT EYE LEVEL |          |        |        |          |          |          |
|------------|----------------------------------------------------------|----------|--------|--------|----------|----------|----------|
|            | nm                                                       | LED A    | LED B  | LED C  | LED D    | LED E    | LED F    |
| 380        | 0.0132                                                   | 0.0129   | 0.0112 | 0.012  | 7.68E-03 | 9.58E-03 | 5.47E-03 |
| 381        | 0.0129                                                   | 0.0124   | 0.0133 | 0.0116 | 7.24E-03 | 9.12E-03 | 5.14E-03 |
| 382        | 0.0139                                                   | 0.0117   | 0.0159 | 0.0115 | 7.65E-03 | 8.90E-03 | 5.75E-03 |
| 383        | 0.0149                                                   | 0.0112   | 0.0188 | 0.0115 | 7.67E-03 | 8.96E-03 | 5.93E-03 |
| 384        | 0.0129                                                   | 0.0108   | 0.0218 | 0.0116 | 7.63E-03 | 9.02E-03 | 5.56E-03 |
| 385        | 0.013                                                    | 0.0106   | 0.0271 | 0.0119 | 8.39E-03 | 9.72E-03 | 5.59E-03 |
| 386        | 0.0131                                                   | 0.0104   | 0.0325 | 0.0122 | 9.15E-03 | 0.0104   | 5.62E-03 |
| 387        | 0.0127                                                   | 0.0104   | 0.0398 | 0.0123 | 9.89E-03 | 0.0113   | 5.32E-03 |
| 388        | 0.0124                                                   | 0.0101   | 0.0459 | 0.0122 | 0.0106   | 0.0122   | 5.01E-03 |
| 389        | 0.0131                                                   | 0.0103   | 0.057  | 0.0125 | 0.0124   | 0.0136   | 4.91E-03 |
| 390        | 0.0137                                                   | 0.0106   | 0.0676 | 0.0128 | 0.0141   | 0.0151   | 4.80E-03 |
| 391        | 0.0141                                                   | 0.0104   | 0.0795 | 0.0122 | 0.0168   | 0.0173   | 4.65E-03 |
| 392        | 0.0134                                                   | 9.73E-03 | 0.0909 | 0.0116 | 0.0195   | 0.0194   | 4.50E-03 |
| 393        | 0.0137                                                   | 9.62E-03 | 0.1093 | 0.0121 | 0.0246   | 0.0239   | 4.94E-03 |
| 394        | 0.014                                                    | 9.57E-03 | 0.1271 | 0.0125 | 0.0296   | 0.0284   | 5.38E-03 |
| 395        | 0.0138                                                   | 9.29E-03 | 0.1494 | 0.0128 | 0.0384   | 0.0357   | 5.59E-03 |
| 396        | 0.0136                                                   | 8.97E-03 | 0.1712 | 0.0123 | 0.0473   | 0.0431   | 5.81E-03 |
| 397        | 0.0139                                                   | 8.39E-03 | 0.2307 | 0.0125 | 0.0785   | 0.069    | 6.49E-03 |
| 398        | 0.0142                                                   | 8.03E-03 | 0.2649 | 0.0128 | 0.1019   | 0.0885   | 0.0156   |
| 399        | 0.0144                                                   | 7.73E-03 | 0.2994 | 0.0131 | 0.1254   | 0.1081   | 0.0248   |
| 400        | 0.0149                                                   | 7.98E-03 | 0.3565 | 0.0127 | 0.1658   | 0.1416   | 0.0289   |
| 401        | 0.0154                                                   | 8.23E-03 | 0.4136 | 0.0123 | 0.2063   | 0.1752   | 0.0329   |
| 402        | 0.0155                                                   | 8.37E-03 | 0.4705 | 0.012  | 0.2567   | 0.2173   | 0.0335   |
| 403        | 0.0156                                                   | 8.20E-03 | 0.5272 | 0.0117 | 0.3072   | 0.2594   | 0.034    |
| 404        | 0.0171                                                   | 8.79E-03 | 0.6075 | 0.0116 | 0.3833   | 0.3259   | 0.0349   |
| 405        | 0.0185                                                   | 9.37E-03 | 0.6872 | 0.0116 | 0.4594   | 0.3924   | 0.0357   |
| 406        | 0.0196                                                   | 9.65E-03 | 0.7548 | 0.0116 | 0.5393   | 0.4662   | 0.036    |
| 407        | 0.0207                                                   | 9.89E-03 | 0.8212 | 0.0115 | 0.6193   | 0.5401   | 0.0363   |
| 408        | 0.0235                                                   | 0.0105   | 0.8845 | 0.0117 | 0.7055   | 0.6256   | 0.0365   |
| 409        | 0.0263                                                   | 0.0111   | 0.9457 | 0.0118 | 0.7916   | 0.7111   | 0.0367   |
| 410        | 0.0312                                                   | 0.0122   | 0.9685 | 0.0121 | 0.8851   | 0.8221   | 0.0214   |
| 411        | 0.0365                                                   | 0.0137   | 0.9856 | 0.0121 | 0.937    | 0.8878   | 0.0184   |
| 412        | 0.0418                                                   | 0.0152   | 1      | 0.012  | 0.989    | 0.9535   | 0.0155   |
| 413        | 0.0477                                                   | 0.0168   | 0.9569 | 0.0123 | 1        | 0.9648   | 0.0153   |
| 414        | 0.0537                                                   | 0.0183   | 0.9115 | 0.0125 | 0.978    | 0.976    | 0.0152   |
| 415        | 0.0634                                                   | 0.0214   | 0.8714 | 0.0135 | 0.9727   | 0.988    | 0.0168   |

|     |        |        |          |        |        |        |        |
|-----|--------|--------|----------|--------|--------|--------|--------|
| 416 | 0.0732 | 0.0245 | 0.8293   | 0.0144 | 0.9675 | 1      | 0.0184 |
| 417 | 0.0845 | 0.0277 | 0.7535   | 0.0156 | 0.9155 | 0.9625 | 0.0197 |
| 418 | 0.0959 | 0.0309 | 0.676    | 0.0169 | 0.8636 | 0.925  | 0.021  |
| 419 | 0.1105 | 0.0352 | 0.6009   | 0.0185 | 0.8023 | 0.8734 | 0.0227 |
| 420 | 0.1252 | 0.0396 | 0.5245   | 0.0201 | 0.741  | 0.8217 | 0.0244 |
| 421 | 0.1438 | 0.0449 | 0.4579   | 0.022  | 0.6781 | 0.7614 | 0.0268 |
| 422 | 0.1625 | 0.0504 | 0.3904   | 0.024  | 0.6152 | 0.701  | 0.0292 |
| 423 | 0.2008 | 0.0618 | 0.273    | 0.0296 | 0.4844 | 0.561  | 0.0322 |
| 424 | 0.2231 | 0.0685 | 0.2318   | 0.0326 | 0.4325 | 0.5031 | 0.0345 |
| 425 | 0.2454 | 0.0753 | 0.1904   | 0.0356 | 0.3807 | 0.4453 | 0.0368 |
| 426 | 0.2784 | 0.085  | 0.1651   | 0.04   | 0.3472 | 0.4073 | 0.0409 |
| 427 | 0.3113 | 0.0947 | 0.1397   | 0.0445 | 0.3137 | 0.3693 | 0.0449 |
| 428 | 0.3452 | 0.1043 | 0.119    | 0.0497 | 0.282  | 0.3337 | 0.0679 |
| 429 | 0.379  | 0.1138 | 0.0983   | 0.055  | 0.2504 | 0.2981 | 0.0908 |
| 430 | 0.4215 | 0.1243 | 0.0837   | 0.0623 | 0.2255 | 0.2699 | 0.1585 |
| 431 | 0.464  | 0.1348 | 0.0693   | 0.0697 | 0.2007 | 0.2418 | 0.2261 |
| 432 | 0.5113 | 0.1466 | 0.0594   | 0.0783 | 0.1803 | 0.2185 | 0.2403 |
| 433 | 0.5586 | 0.1584 | 0.0496   | 0.0869 | 0.1598 | 0.1952 | 0.2545 |
| 434 | 0.6065 | 0.171  | 0.0425   | 0.0962 | 0.143  | 0.1754 | 0.2552 |
| 435 | 0.6544 | 0.1836 | 0.0355   | 0.1055 | 0.1263 | 0.1555 | 0.2558 |
| 436 | 0.7411 | 0.2104 | 0.027    | 0.1273 | 0.0995 | 0.1235 | 0.2521 |
| 437 | 0.7906 | 0.229  | 0.0237   | 0.1416 | 0.0905 | 0.1123 | 0.2529 |
| 438 | 0.8401 | 0.2476 | 0.0205   | 0.1559 | 0.0815 | 0.1011 | 0.2537 |
| 439 | 0.8811 | 0.2701 | 0.0181   | 0.174  | 0.0744 | 0.0925 | 0.2453 |
| 440 | 0.9222 | 0.2926 | 0.0158   | 0.192  | 0.0674 | 0.0839 | 0.2369 |
| 441 | 0.9469 | 0.3167 | 0.0141   | 0.2133 | 0.0616 | 0.0765 | 0.1759 |
| 442 | 0.9717 | 0.3409 | 0.0125   | 0.2346 | 0.0558 | 0.0692 | 0.1149 |
| 443 | 0.9858 | 0.3696 | 0.0115   | 0.2608 | 0.0515 | 0.0636 | 0.104  |
| 444 | 1      | 0.3985 | 0.0105   | 0.2869 | 0.0471 | 0.058  | 0.093  |
| 445 | 0.9869 | 0.423  | 9.82E-03 | 0.3114 | 0.0428 | 0.0528 | 0.0929 |
| 446 | 0.9738 | 0.4478 | 9.09E-03 | 0.3359 | 0.0385 | 0.0476 | 0.0929 |
| 447 | 0.9632 | 0.4771 | 8.47E-03 | 0.3666 | 0.0361 | 0.0443 | 0.0948 |
| 448 | 0.9526 | 0.5068 | 7.85E-03 | 0.3973 | 0.0337 | 0.041  | 0.0967 |
| 449 | 0.8773 | 0.5367 | 7.20E-03 | 0.4394 | 0.0285 | 0.035  | 0.0975 |
| 450 | 0.8429 | 0.5478 | 6.97E-03 | 0.4591 | 0.0267 | 0.0326 | 0.0985 |
| 451 | 0.8085 | 0.559  | 6.74E-03 | 0.4789 | 0.025  | 0.0301 | 0.0994 |
| 452 | 0.7629 | 0.5528 | 6.05E-03 | 0.484  | 0.0237 | 0.0279 | 0.0997 |
| 453 | 0.7174 | 0.5468 | 5.36E-03 | 0.4892 | 0.0225 | 0.0256 | 0.0992 |
| 454 | 0.6845 | 0.5392 | 5.22E-03 | 0.4939 | 0.0215 | 0.0245 | 0.1006 |
| 455 | 0.6517 | 0.5315 | 5.09E-03 | 0.4985 | 0.0206 | 0.0234 | 0.1021 |
| 456 | 0.6114 | 0.5075 | 5.24E-03 | 0.4859 | 0.0202 | 0.0221 | 0.1009 |
| 457 | 0.5712 | 0.4834 | 5.39E-03 | 0.4732 | 0.0197 | 0.0207 | 0.0997 |
| 458 | 0.5455 | 0.4639 | 5.44E-03 | 0.4629 | 0.0199 | 0.0201 | 0.1003 |

|     |        |        |          |        |        |        |        |
|-----|--------|--------|----------|--------|--------|--------|--------|
| 459 | 0.5197 | 0.4444 | 5.40E-03 | 0.4526 | 0.0201 | 0.0195 | 0.101  |
| 460 | 0.4592 | 0.3901 | 5.48E-03 | 0.4095 | 0.0203 | 0.0178 | 0.0984 |
| 461 | 0.438  | 0.3701 | 5.35E-03 | 0.3918 | 0.0206 | 0.0172 | 0.0981 |
| 462 | 0.4168 | 0.3501 | 5.23E-03 | 0.3741 | 0.0209 | 0.0165 | 0.0979 |
| 463 | 0.3947 | 0.3304 | 5.50E-03 | 0.3549 | 0.0217 | 0.016  | 0.0966 |
| 464 | 0.3727 | 0.3107 | 5.78E-03 | 0.3358 | 0.0224 | 0.0155 | 0.0953 |
| 465 | 0.3589 | 0.2986 | 5.57E-03 | 0.3236 | 0.0236 | 0.0151 | 0.0954 |
| 466 | 0.3451 | 0.2866 | 5.36E-03 | 0.3113 | 0.0247 | 0.0148 | 0.0956 |
| 467 | 0.3303 | 0.274  | 5.91E-03 | 0.2984 | 0.0261 | 0.0144 | 0.0943 |
| 468 | 0.3155 | 0.2614 | 6.46E-03 | 0.2855 | 0.0274 | 0.014  | 0.093  |
| 469 | 0.3048 | 0.2508 | 6.85E-03 | 0.2761 | 0.0292 | 0.0142 | 0.0923 |
| 470 | 0.294  | 0.2403 | 7.25E-03 | 0.2667 | 0.031  | 0.0145 | 0.0915 |
| 471 | 0.2698 | 0.217  | 8.46E-03 | 0.2432 | 0.0353 | 0.0147 | 0.0867 |
| 472 | 0.2662 | 0.2101 | 9.18E-03 | 0.237  | 0.0378 | 0.0148 | 0.0866 |
| 473 | 0.2626 | 0.2032 | 9.90E-03 | 0.2309 | 0.0403 | 0.0147 | 0.0866 |
| 474 | 0.2582 | 0.1961 | 0.0104   | 0.2243 | 0.0434 | 0.0152 | 0.087  |
| 475 | 0.2539 | 0.1891 | 0.011    | 0.2178 | 0.0464 | 0.0156 | 0.0873 |
| 476 | 0.2533 | 0.1838 | 0.0119   | 0.2126 | 0.0499 | 0.0161 | 0.0918 |
| 477 | 0.2528 | 0.1786 | 0.0128   | 0.2074 | 0.0533 | 0.0166 | 0.0962 |
| 478 | 0.2545 | 0.1756 | 0.0141   | 0.2035 | 0.0574 | 0.0171 | 0.1067 |
| 479 | 0.2562 | 0.1726 | 0.0153   | 0.1997 | 0.0614 | 0.0177 | 0.1172 |
| 480 | 0.258  | 0.1702 | 0.0165   | 0.1965 | 0.0656 | 0.0187 | 0.1351 |
| 481 | 0.2598 | 0.1678 | 0.0176   | 0.1932 | 0.0697 | 0.0197 | 0.153  |
| 482 | 0.2654 | 0.164  | 0.0211   | 0.1871 | 0.078  | 0.0224 | 0.1946 |
| 483 | 0.2722 | 0.1649 | 0.0231   | 0.1868 | 0.0832 | 0.0242 | 0.2151 |
| 484 | 0.2789 | 0.1658 | 0.025    | 0.1865 | 0.0883 | 0.0261 | 0.2357 |
| 485 | 0.287  | 0.1683 | 0.0268   | 0.1872 | 0.0938 | 0.0282 | 0.2528 |
| 486 | 0.295  | 0.1707 | 0.0286   | 0.1879 | 0.0993 | 0.0302 | 0.2699 |
| 487 | 0.3034 | 0.1734 | 0.0309   | 0.1889 | 0.1048 | 0.0329 | 0.2805 |
| 488 | 0.3117 | 0.1761 | 0.0333   | 0.1898 | 0.1102 | 0.0356 | 0.2911 |
| 489 | 0.3224 | 0.1802 | 0.0357   | 0.1925 | 0.1165 | 0.039  | 0.2941 |
| 490 | 0.3331 | 0.1844 | 0.0382   | 0.1953 | 0.1228 | 0.0424 | 0.2972 |
| 491 | 0.3513 | 0.1923 | 0.0427   | 0.1995 | 0.1343 | 0.0507 | 0.2775 |
| 492 | 0.3636 | 0.1988 | 0.046    | 0.2039 | 0.1412 | 0.0563 | 0.2617 |
| 493 | 0.3759 | 0.2053 | 0.0492   | 0.2083 | 0.1481 | 0.0618 | 0.2459 |
| 494 | 0.3875 | 0.2122 | 0.0525   | 0.2125 | 0.1548 | 0.0686 | 0.2268 |
| 495 | 0.3991 | 0.2192 | 0.0558   | 0.2168 | 0.1615 | 0.0753 | 0.2077 |
| 496 | 0.4124 | 0.2278 | 0.0592   | 0.2227 | 0.1688 | 0.084  | 0.1895 |
| 497 | 0.4258 | 0.2364 | 0.0627   | 0.2285 | 0.1762 | 0.0927 | 0.1713 |
| 498 | 0.4367 | 0.2437 | 0.0651   | 0.2333 | 0.1823 | 0.1016 | 0.1539 |
| 499 | 0.4476 | 0.251  | 0.0675   | 0.2382 | 0.1885 | 0.1105 | 0.1365 |
| 500 | 0.4623 | 0.2619 | 0.0717   | 0.2467 | 0.1968 | 0.1219 | 0.1233 |
| 501 | 0.477  | 0.2728 | 0.076    | 0.2551 | 0.2052 | 0.1333 | 0.1101 |

|     |        |        |        |        |        |        |        |
|-----|--------|--------|--------|--------|--------|--------|--------|
| 502 | 0.4971 | 0.2887 | 0.0817 | 0.2686 | 0.2175 | 0.1564 | 0.0854 |
| 503 | 0.5102 | 0.2992 | 0.0855 | 0.2777 | 0.2255 | 0.1708 | 0.0763 |
| 504 | 0.5233 | 0.3097 | 0.0893 | 0.2868 | 0.2335 | 0.1852 | 0.0671 |
| 505 | 0.5321 | 0.3182 | 0.0922 | 0.2933 | 0.2397 | 0.2001 | 0.0607 |
| 506 | 0.5408 | 0.3267 | 0.0952 | 0.2998 | 0.246  | 0.215  | 0.0542 |
| 507 | 0.5556 | 0.3386 | 0.099  | 0.3105 | 0.2543 | 0.2342 | 0.051  |
| 508 | 0.5703 | 0.3505 | 0.1029 | 0.3213 | 0.2627 | 0.2534 | 0.0477 |
| 509 | 0.5805 | 0.3609 | 0.1059 | 0.3302 | 0.2695 | 0.271  | 0.0459 |
| 510 | 0.5906 | 0.3713 | 0.1088 | 0.339  | 0.2763 | 0.2886 | 0.044  |
| 511 | 0.6075 | 0.3882 | 0.1144 | 0.3556 | 0.288  | 0.323  | 0.0416 |
| 512 | 0.6134 | 0.3957 | 0.1167 | 0.3626 | 0.2927 | 0.3383 | 0.0406 |
| 513 | 0.6193 | 0.4031 | 0.1191 | 0.3695 | 0.2974 | 0.3537 | 0.0395 |
| 514 | 0.6309 | 0.4139 | 0.1227 | 0.3804 | 0.3048 | 0.3718 | 0.0389 |
| 515 | 0.6426 | 0.4248 | 0.1263 | 0.3914 | 0.3121 | 0.3899 | 0.0382 |
| 516 | 0.6486 | 0.4327 | 0.1288 | 0.3989 | 0.3173 | 0.4039 | 0.0369 |
| 517 | 0.6547 | 0.4406 | 0.1313 | 0.4064 | 0.3225 | 0.418  | 0.0356 |
| 518 | 0.6626 | 0.4498 | 0.1341 | 0.4157 | 0.328  | 0.4319 | 0.0349 |
| 519 | 0.6706 | 0.4591 | 0.1369 | 0.4249 | 0.3336 | 0.4457 | 0.0342 |
| 520 | 0.6724 | 0.4675 | 0.1395 | 0.4343 | 0.3375 | 0.4622 | 0.0317 |
| 521 | 0.6816 | 0.4776 | 0.1424 | 0.4443 | 0.3432 | 0.4755 | 0.0317 |
| 522 | 0.6908 | 0.4877 | 0.1453 | 0.4544 | 0.3488 | 0.4888 | 0.0317 |
| 523 | 0.6949 | 0.4944 | 0.1471 | 0.4618 | 0.3521 | 0.498  | 0.0317 |
| 524 | 0.699  | 0.5011 | 0.1488 | 0.4692 | 0.3554 | 0.5072 | 0.0317 |
| 525 | 0.7046 | 0.5086 | 0.1512 | 0.4776 | 0.3593 | 0.5164 | 0.0324 |
| 526 | 0.7102 | 0.5161 | 0.1536 | 0.486  | 0.3633 | 0.5255 | 0.0331 |
| 527 | 0.7155 | 0.5241 | 0.1562 | 0.4952 | 0.3672 | 0.5329 | 0.0356 |
| 528 | 0.7209 | 0.532  | 0.1588 | 0.5044 | 0.3711 | 0.5403 | 0.0381 |
| 529 | 0.722  | 0.54   | 0.1612 | 0.5132 | 0.3729 | 0.5434 | 0.047  |
| 530 | 0.7266 | 0.5473 | 0.163  | 0.5213 | 0.3756 | 0.5469 | 0.0561 |
| 531 | 0.7312 | 0.5545 | 0.1649 | 0.5295 | 0.3783 | 0.5503 | 0.0653 |
| 532 | 0.7332 | 0.56   | 0.1665 | 0.5358 | 0.3794 | 0.5505 | 0.0848 |
| 533 | 0.7352 | 0.5655 | 0.168  | 0.5421 | 0.3804 | 0.5507 | 0.1043 |
| 534 | 0.739  | 0.5722 | 0.1694 | 0.5497 | 0.3824 | 0.5516 | 0.1458 |
| 535 | 0.7428 | 0.5788 | 0.1707 | 0.5573 | 0.3843 | 0.5525 | 0.1874 |
| 536 | 0.7412 | 0.5862 | 0.1723 | 0.5667 | 0.3835 | 0.5469 | 0.348  |
| 537 | 0.7445 | 0.593  | 0.1742 | 0.5748 | 0.3853 | 0.5469 | 0.4599 |
| 538 | 0.7478 | 0.5998 | 0.1761 | 0.5829 | 0.3871 | 0.5469 | 0.5718 |
| 539 | 0.7492 | 0.603  | 0.1766 | 0.5871 | 0.3875 | 0.543  | 0.6748 |
| 540 | 0.7465 | 0.6063 | 0.1771 | 0.5914 | 0.3867 | 0.5391 | 0.7778 |
| 541 | 0.7515 | 0.6149 | 0.1795 | 0.6005 | 0.3891 | 0.539  | 0.8534 |
| 542 | 0.7565 | 0.6236 | 0.1819 | 0.6097 | 0.3914 | 0.539  | 0.9289 |
| 543 | 0.7577 | 0.6287 | 0.1825 | 0.6157 | 0.3917 | 0.5356 | 0.9619 |
| 544 | 0.7589 | 0.6339 | 0.1832 | 0.6218 | 0.392  | 0.5322 | 0.9948 |

|     |        |        |        |        |        |        |        |
|-----|--------|--------|--------|--------|--------|--------|--------|
| 545 | 0.7594 | 0.645  | 0.1843 | 0.634  | 0.3922 | 0.5249 | 1      |
| 546 | 0.757  | 0.6478 | 0.1846 | 0.6384 | 0.3912 | 0.5201 | 0.9574 |
| 547 | 0.7545 | 0.6506 | 0.1849 | 0.6427 | 0.3902 | 0.5154 | 0.9148 |
| 548 | 0.7587 | 0.6589 | 0.1865 | 0.6521 | 0.3925 | 0.5151 | 0.8259 |
| 549 | 0.7629 | 0.6672 | 0.1881 | 0.6614 | 0.3948 | 0.5148 | 0.737  |
| 550 | 0.765  | 0.6724 | 0.1886 | 0.6671 | 0.3952 | 0.512  | 0.6283 |
| 551 | 0.7608 | 0.6776 | 0.189  | 0.6728 | 0.3956 | 0.5092 | 0.5197 |
| 552 | 0.7597 | 0.6885 | 0.1902 | 0.6846 | 0.3971 | 0.5059 | 0.3385 |
| 553 | 0.7576 | 0.692  | 0.1902 | 0.6888 | 0.3972 | 0.5033 | 0.2857 |
| 554 | 0.7554 | 0.6956 | 0.1902 | 0.6931 | 0.3972 | 0.5008 | 0.233  |
| 555 | 0.7586 | 0.7045 | 0.1912 | 0.7028 | 0.4003 | 0.5023 | 0.1969 |
| 556 | 0.7617 | 0.7135 | 0.1922 | 0.7125 | 0.4034 | 0.5039 | 0.1608 |
| 557 | 0.7624 | 0.7207 | 0.1932 | 0.7205 | 0.4061 | 0.5053 | 0.1334 |
| 558 | 0.7632 | 0.728  | 0.1943 | 0.7284 | 0.4088 | 0.5067 | 0.106  |
| 559 | 0.7567 | 0.7355 | 0.1936 | 0.7376 | 0.4106 | 0.5057 | 0.0667 |
| 560 | 0.7547 | 0.7414 | 0.1945 | 0.744  | 0.4133 | 0.5076 | 0.0565 |
| 561 | 0.7527 | 0.7472 | 0.1953 | 0.7504 | 0.4161 | 0.5094 | 0.0463 |
| 562 | 0.7531 | 0.7548 | 0.1961 | 0.7582 | 0.4202 | 0.513  | 0.0415 |
| 563 | 0.7536 | 0.7623 | 0.1969 | 0.766  | 0.4243 | 0.5166 | 0.0366 |
| 564 | 0.7538 | 0.7704 | 0.1974 | 0.774  | 0.4286 | 0.5215 | 0.0345 |
| 565 | 0.7541 | 0.7786 | 0.1978 | 0.7821 | 0.433  | 0.5263 | 0.0323 |
| 566 | 0.7487 | 0.7875 | 0.1977 | 0.7919 | 0.4386 | 0.5333 | 0.0308 |
| 567 | 0.7482 | 0.7956 | 0.1979 | 0.8001 | 0.444  | 0.5397 | 0.0323 |
| 568 | 0.7477 | 0.8037 | 0.1982 | 0.8082 | 0.4494 | 0.5461 | 0.0339 |
| 569 | 0.7459 | 0.8102 | 0.1985 | 0.8152 | 0.4541 | 0.5521 | 0.0378 |
| 570 | 0.7441 | 0.8166 | 0.1988 | 0.8221 | 0.4588 | 0.5581 | 0.0418 |
| 571 | 0.7436 | 0.8244 | 0.2    | 0.8305 | 0.4652 | 0.5662 | 0.0504 |
| 572 | 0.7431 | 0.8322 | 0.2012 | 0.8388 | 0.4716 | 0.5742 | 0.059  |
| 573 | 0.7376 | 0.8423 | 0.2015 | 0.8481 | 0.4808 | 0.5863 | 0.0857 |
| 574 | 0.7365 | 0.8496 | 0.2019 | 0.8555 | 0.4878 | 0.595  | 0.1036 |
| 575 | 0.7355 | 0.8568 | 0.2023 | 0.8629 | 0.4947 | 0.6037 | 0.1215 |
| 576 | 0.7324 | 0.8625 | 0.2028 | 0.868  | 0.5    | 0.611  | 0.1424 |
| 577 | 0.7293 | 0.8681 | 0.2023 | 0.8731 | 0.5052 | 0.6184 | 0.1633 |
| 578 | 0.7295 | 0.8772 | 0.2032 | 0.8816 | 0.513  | 0.6289 | 0.1878 |
| 579 | 0.7297 | 0.8862 | 0.2041 | 0.8901 | 0.5209 | 0.6395 | 0.2123 |
| 580 | 0.724  | 0.8949 | 0.2042 | 0.8998 | 0.5321 | 0.655  | 0.2585 |
| 581 | 0.7236 | 0.903  | 0.2054 | 0.9073 | 0.5399 | 0.6653 | 0.2804 |
| 582 | 0.7232 | 0.911  | 0.2066 | 0.9149 | 0.5477 | 0.6756 | 0.3023 |
| 583 | 0.7215 | 0.917  | 0.207  | 0.9205 | 0.5547 | 0.6848 | 0.3156 |
| 584 | 0.7199 | 0.923  | 0.2075 | 0.9262 | 0.5616 | 0.694  | 0.3289 |
| 585 | 0.7165 | 0.9333 | 0.2083 | 0.9362 | 0.5744 | 0.7114 | 0.3364 |
| 586 | 0.7134 | 0.9362 | 0.2083 | 0.9396 | 0.58   | 0.7189 | 0.3409 |
| 587 | 0.7103 | 0.9391 | 0.2083 | 0.9431 | 0.5856 | 0.7264 | 0.3318 |

|     |        |        |        |        |        |        |        |
|-----|--------|--------|--------|--------|--------|--------|--------|
| 588 | 0.7109 | 0.9474 | 0.2092 | 0.9498 | 0.5935 | 0.7368 | 0.3237 |
| 589 | 0.7115 | 0.9558 | 0.2101 | 0.9566 | 0.6015 | 0.7471 | 0.3157 |
| 590 | 0.7105 | 0.9606 | 0.2105 | 0.9613 | 0.6075 | 0.7551 | 0.3001 |
| 591 | 0.7094 | 0.9655 | 0.211  | 0.966  | 0.6134 | 0.7632 | 0.2846 |
| 592 | 0.7057 | 0.972  | 0.2115 | 0.9747 | 0.6244 | 0.7788 | 0.2479 |
| 593 | 0.7045 | 0.9754 | 0.212  | 0.9775 | 0.6298 | 0.7856 | 0.23   |
| 594 | 0.7034 | 0.9788 | 0.2124 | 0.9803 | 0.6352 | 0.7923 | 0.212  |
| 595 | 0.7031 | 0.9828 | 0.2135 | 0.9841 | 0.6407 | 0.8    | 0.1986 |
| 596 | 0.7028 | 0.9868 | 0.2146 | 0.9879 | 0.6462 | 0.8077 | 0.1851 |
| 597 | 0.6981 | 0.9862 | 0.2139 | 0.9863 | 0.6513 | 0.8141 | 0.1617 |
| 598 | 0.6985 | 0.991  | 0.2147 | 0.9905 | 0.6566 | 0.8213 | 0.1541 |
| 599 | 0.6989 | 0.9959 | 0.2154 | 0.9947 | 0.662  | 0.8285 | 0.1465 |
| 600 | 0.6991 | 0.9979 | 0.2155 | 0.9971 | 0.666  | 0.8339 | 0.15   |
| 601 | 0.6992 | 1      | 0.2156 | 0.9996 | 0.67   | 0.8392 | 0.1534 |
| 602 | 0.698  | 1      | 0.2161 | 0.9998 | 0.6723 | 0.8424 | 0.1748 |
| 603 | 0.6969 | 1      | 0.2165 | 1      | 0.6745 | 0.8455 | 0.1961 |
| 604 | 0.694  | 0.9973 | 0.2175 | 0.9969 | 0.6773 | 0.8485 | 0.3079 |
| 605 | 0.6943 | 0.9976 | 0.2184 | 0.9974 | 0.6794 | 0.8516 | 0.4057 |
| 606 | 0.6946 | 0.998  | 0.2193 | 0.9979 | 0.6815 | 0.8547 | 0.5035 |
| 607 | 0.6948 | 0.9979 | 0.2195 | 0.997  | 0.683  | 0.8567 | 0.5849 |
| 608 | 0.6951 | 0.9979 | 0.2194 | 0.9961 | 0.6845 | 0.8587 | 0.6664 |
| 609 | 0.6934 | 0.9918 | 0.2193 | 0.9892 | 0.6826 | 0.8574 | 0.7635 |
| 610 | 0.6932 | 0.9899 | 0.2189 | 0.9872 | 0.6826 | 0.8571 | 0.7911 |
| 611 | 0.6931 | 0.988  | 0.2185 | 0.9853 | 0.6827 | 0.8567 | 0.8187 |
| 612 | 0.6917 | 0.9833 | 0.2188 | 0.9805 | 0.6803 | 0.8543 | 0.8262 |
| 613 | 0.6904 | 0.9786 | 0.2191 | 0.9757 | 0.678  | 0.8519 | 0.8337 |
| 614 | 0.6901 | 0.9716 | 0.2192 | 0.9712 | 0.6764 | 0.8487 | 0.8077 |
| 615 | 0.6894 | 0.9671 | 0.2194 | 0.9663 | 0.6737 | 0.846  | 0.7501 |
| 616 | 0.6886 | 0.9626 | 0.2197 | 0.9614 | 0.671  | 0.8434 | 0.6925 |
| 617 | 0.6883 | 0.9575 | 0.2198 | 0.9565 | 0.6684 | 0.8401 | 0.6039 |
| 618 | 0.688  | 0.9524 | 0.2199 | 0.9516 | 0.6658 | 0.8368 | 0.5153 |
| 619 | 0.6872 | 0.9469 | 0.2197 | 0.9464 | 0.6618 | 0.8322 | 0.4546 |
| 620 | 0.6863 | 0.9414 | 0.2195 | 0.9413 | 0.6579 | 0.8276 | 0.3939 |
| 621 | 0.6842 | 0.928  | 0.2179 | 0.9288 | 0.6502 | 0.8175 | 0.3218 |
| 622 | 0.683  | 0.9207 | 0.2174 | 0.9227 | 0.6452 | 0.8113 | 0.3016 |
| 623 | 0.6818 | 0.9134 | 0.2168 | 0.9166 | 0.6401 | 0.8052 | 0.2815 |
| 624 | 0.6817 | 0.9074 | 0.2165 | 0.9125 | 0.6363 | 0.8008 | 0.2713 |
| 625 | 0.6817 | 0.9015 | 0.2162 | 0.9084 | 0.6326 | 0.7964 | 0.2612 |
| 626 | 0.6771 | 0.8834 | 0.2162 | 0.8931 | 0.6205 | 0.7817 | 0.241  |
| 627 | 0.6766 | 0.8763 | 0.2156 | 0.8875 | 0.6156 | 0.7756 | 0.2281 |
| 628 | 0.6761 | 0.8692 | 0.215  | 0.8819 | 0.6107 | 0.7695 | 0.2152 |
| 629 | 0.6746 | 0.8605 | 0.2142 | 0.8751 | 0.6046 | 0.7619 | 0.2011 |
| 630 | 0.6731 | 0.8519 | 0.2135 | 0.8682 | 0.5986 | 0.7543 | 0.187  |

|     |        |        |        |        |        |        |        |
|-----|--------|--------|--------|--------|--------|--------|--------|
| 631 | 0.6716 | 0.8356 | 0.2127 | 0.8557 | 0.5864 | 0.7397 | 0.1615 |
| 632 | 0.6692 | 0.827  | 0.2112 | 0.8484 | 0.5804 | 0.7317 | 0.1495 |
| 633 | 0.6668 | 0.8184 | 0.2097 | 0.8411 | 0.5743 | 0.7237 | 0.1375 |
| 634 | 0.6654 | 0.8093 | 0.2087 | 0.8352 | 0.5682 | 0.7164 | 0.1249 |
| 635 | 0.664  | 0.8002 | 0.2078 | 0.8293 | 0.5622 | 0.7091 | 0.1123 |
| 636 | 0.6583 | 0.7791 | 0.2067 | 0.8124 | 0.5474 | 0.6908 | 0.0836 |
| 637 | 0.657  | 0.7707 | 0.206  | 0.8058 | 0.5413 | 0.6836 | 0.0712 |
| 638 | 0.6557 | 0.7622 | 0.2053 | 0.7991 | 0.5352 | 0.6763 | 0.0589 |
| 639 | 0.6539 | 0.7532 | 0.2037 | 0.7913 | 0.5287 | 0.6682 | 0.0529 |
| 640 | 0.6522 | 0.7441 | 0.2022 | 0.7835 | 0.5222 | 0.6601 | 0.0469 |
| 641 | 0.6457 | 0.7247 | 0.1995 | 0.7649 | 0.5074 | 0.6422 | 0.0436 |
| 642 | 0.6432 | 0.7143 | 0.198  | 0.7567 | 0.5003 | 0.6333 | 0.0439 |
| 643 | 0.6406 | 0.7039 | 0.1966 | 0.7485 | 0.4932 | 0.6245 | 0.0442 |
| 644 | 0.6376 | 0.6948 | 0.1952 | 0.7402 | 0.4864 | 0.6161 | 0.0466 |
| 645 | 0.6347 | 0.6856 | 0.1938 | 0.7319 | 0.4797 | 0.6077 | 0.049  |
| 646 | 0.6271 | 0.6649 | 0.1909 | 0.7144 | 0.4653 | 0.5902 | 0.0533 |
| 647 | 0.624  | 0.6552 | 0.19   | 0.705  | 0.4587 | 0.5817 | 0.0543 |
| 648 | 0.6209 | 0.6455 | 0.1891 | 0.6955 | 0.452  | 0.5732 | 0.0553 |
| 649 | 0.6128 | 0.6251 | 0.1849 | 0.6777 | 0.4379 | 0.5558 | 0.0561 |
| 650 | 0.609  | 0.6162 | 0.1837 | 0.6682 | 0.431  | 0.5472 | 0.0555 |
| 651 | 0.6053 | 0.6073 | 0.1824 | 0.6587 | 0.424  | 0.5386 | 0.0549 |
| 652 | 0.6014 | 0.5979 | 0.1806 | 0.6502 | 0.4172 | 0.5301 | 0.0542 |
| 653 | 0.5976 | 0.5886 | 0.1789 | 0.6416 | 0.4103 | 0.5217 | 0.0536 |
| 654 | 0.5885 | 0.569  | 0.1756 | 0.6221 | 0.3958 | 0.5037 | 0.0511 |
| 655 | 0.5836 | 0.5597 | 0.174  | 0.6129 | 0.3895 | 0.4956 | 0.0487 |
| 656 | 0.5787 | 0.5504 | 0.1723 | 0.6038 | 0.3831 | 0.4875 | 0.0462 |
| 657 | 0.573  | 0.5408 | 0.1706 | 0.5941 | 0.3763 | 0.4792 | 0.0448 |
| 658 | 0.5674 | 0.5313 | 0.1688 | 0.5844 | 0.3695 | 0.471  | 0.0433 |
| 659 | 0.5585 | 0.5127 | 0.1655 | 0.5659 | 0.3563 | 0.4549 | 0.0404 |
| 660 | 0.5527 | 0.5034 | 0.164  | 0.5563 | 0.3497 | 0.447  | 0.0403 |
| 661 | 0.5469 | 0.4941 | 0.1625 | 0.5467 | 0.3432 | 0.439  | 0.0403 |
| 662 | 0.5424 | 0.4857 | 0.1604 | 0.5377 | 0.337  | 0.4309 | 0.0405 |
| 663 | 0.5378 | 0.4772 | 0.1584 | 0.5286 | 0.3308 | 0.4228 | 0.0407 |
| 664 | 0.5257 | 0.4604 | 0.1538 | 0.5105 | 0.3182 | 0.4072 | 0.0414 |
| 665 | 0.5198 | 0.452  | 0.152  | 0.5021 | 0.3121 | 0.3997 | 0.0409 |
| 666 | 0.5138 | 0.4437 | 0.1503 | 0.4936 | 0.3059 | 0.3921 | 0.0404 |
| 667 | 0.5036 | 0.4268 | 0.1468 | 0.4768 | 0.2942 | 0.3782 | 0.039  |
| 668 | 0.4972 | 0.4191 | 0.145  | 0.4686 | 0.2886 | 0.3709 | 0.0378 |
| 669 | 0.4907 | 0.4115 | 0.1433 | 0.4604 | 0.283  | 0.3636 | 0.0366 |
| 670 | 0.4853 | 0.4034 | 0.1413 | 0.452  | 0.2774 | 0.3567 | 0.0349 |
| 671 | 0.4798 | 0.3953 | 0.1394 | 0.4436 | 0.2717 | 0.3499 | 0.0331 |
| 672 | 0.4688 | 0.3814 | 0.1358 | 0.4282 | 0.261  | 0.3371 | 0.0326 |
| 673 | 0.4631 | 0.3743 | 0.1337 | 0.42   | 0.256  | 0.3303 | 0.0327 |

|     |        |        |        |        |        |        |        |
|-----|--------|--------|--------|--------|--------|--------|--------|
| 674 | 0.4574 | 0.3671 | 0.1315 | 0.4118 | 0.251  | 0.3236 | 0.0328 |
| 675 | 0.4456 | 0.3523 | 0.1278 | 0.3977 | 0.2404 | 0.3102 | 0.0326 |
| 676 | 0.4397 | 0.3456 | 0.1259 | 0.3908 | 0.2358 | 0.3047 | 0.0319 |
| 677 | 0.4339 | 0.3388 | 0.1241 | 0.3839 | 0.2311 | 0.2992 | 0.0312 |
| 678 | 0.428  | 0.3321 | 0.1224 | 0.3766 | 0.2264 | 0.2932 | 0.0312 |
| 679 | 0.4221 | 0.3253 | 0.1207 | 0.3694 | 0.2216 | 0.2872 | 0.0313 |
| 680 | 0.4105 | 0.3113 | 0.1174 | 0.3556 | 0.2129 | 0.2767 | 0.0318 |
| 681 | 0.4045 | 0.3055 | 0.1155 | 0.3484 | 0.2081 | 0.2705 | 0.0325 |
| 682 | 0.3985 | 0.2996 | 0.1135 | 0.3411 | 0.2033 | 0.2643 | 0.0332 |
| 683 | 0.3883 | 0.2876 | 0.1089 | 0.3288 | 0.1959 | 0.2543 | 0.0345 |
| 684 | 0.3825 | 0.2824 | 0.1077 | 0.322  | 0.1913 | 0.2489 | 0.0346 |
| 685 | 0.3767 | 0.2772 | 0.1065 | 0.3152 | 0.1867 | 0.2436 | 0.0344 |
| 686 | 0.3713 | 0.2711 | 0.104  | 0.3094 | 0.1827 | 0.2386 | 0.0342 |
| 687 | 0.3659 | 0.2649 | 0.1016 | 0.3035 | 0.1787 | 0.2337 | 0.034  |
| 688 | 0.3552 | 0.2537 | 0.099  | 0.2931 | 0.1718 | 0.2241 | 0.0338 |
| 689 | 0.3496 | 0.2491 | 0.0979 | 0.2872 | 0.1685 | 0.2195 | 0.0335 |
| 690 | 0.344  | 0.2444 | 0.0968 | 0.2814 | 0.1652 | 0.2148 | 0.0332 |
| 691 | 0.3339 | 0.2337 | 0.0937 | 0.2697 | 0.1579 | 0.2067 | 0.031  |
| 692 | 0.3288 | 0.2296 | 0.0915 | 0.2643 | 0.1547 | 0.2024 | 0.0298 |
| 693 | 0.3238 | 0.2254 | 0.0894 | 0.2588 | 0.1515 | 0.198  | 0.0286 |
| 694 | 0.3186 | 0.2198 | 0.0871 | 0.2534 | 0.148  | 0.1936 | 0.0277 |
| 695 | 0.3133 | 0.2142 | 0.0848 | 0.248  | 0.1445 | 0.1892 | 0.0268 |
| 696 | 0.3044 | 0.2071 | 0.0841 | 0.2393 | 0.1387 | 0.1822 | 0.0244 |
| 697 | 0.2986 | 0.2024 | 0.082  | 0.2347 | 0.1354 | 0.1783 | 0.0256 |
| 698 | 0.2928 | 0.1978 | 0.0799 | 0.2301 | 0.1321 | 0.1745 | 0.0267 |
| 699 | 0.2848 | 0.1897 | 0.08   | 0.2211 | 0.1275 | 0.1683 | 0.0315 |
| 700 | 0.2794 | 0.186  | 0.0778 | 0.2155 | 0.1244 | 0.1646 | 0.0358 |
| 701 | 0.274  | 0.1823 | 0.0756 | 0.2099 | 0.1213 | 0.1609 | 0.0402 |
| 702 | 0.2665 | 0.1761 | 0.0729 | 0.202  | 0.117  | 0.1553 | 0.0549 |
| 703 | 0.2617 | 0.1723 | 0.0711 | 0.1969 | 0.1143 | 0.1516 | 0.0618 |
| 704 | 0.2568 | 0.1684 | 0.0692 | 0.1917 | 0.1116 | 0.1479 | 0.0687 |
| 705 | 0.2478 | 0.1606 | 0.0662 | 0.1854 | 0.1069 | 0.1421 | 0.0825 |
| 706 | 0.2433 | 0.1569 | 0.0658 | 0.1813 | 0.1044 | 0.1393 | 0.0867 |
| 707 | 0.2388 | 0.1533 | 0.0654 | 0.1771 | 0.1019 | 0.1364 | 0.0909 |
| 708 | 0.2343 | 0.1504 | 0.0642 | 0.1732 | 0.1    | 0.1338 | 0.0925 |
| 709 | 0.2298 | 0.1475 | 0.063  | 0.1693 | 0.0982 | 0.1311 | 0.0941 |
| 710 | 0.2224 | 0.1402 | 0.061  | 0.1605 | 0.0937 | 0.1265 | 0.0909 |
| 711 | 0.2188 | 0.1381 | 0.06   | 0.1566 | 0.0916 | 0.1234 | 0.0872 |
| 712 | 0.2153 | 0.136  | 0.0591 | 0.1526 | 0.0894 | 0.1203 | 0.0834 |
| 713 | 0.2071 | 0.1304 | 0.0562 | 0.1451 | 0.0856 | 0.1158 | 0.0696 |
| 714 | 0.2038 | 0.1281 | 0.0545 | 0.1411 | 0.084  | 0.1132 | 0.0628 |
| 715 | 0.2005 | 0.1259 | 0.0528 | 0.1371 | 0.0824 | 0.1106 | 0.0561 |
| 716 | 0.1922 | 0.1204 | 0.0512 | 0.1322 | 0.0778 | 0.1049 | 0.0415 |



|     |        |        |        |        |        |        |          |
|-----|--------|--------|--------|--------|--------|--------|----------|
| 717 | 0.1891 | 0.1173 | 0.0505 | 0.1285 | 0.0766 | 0.1034 | 0.0358   |
| 718 | 0.1859 | 0.1141 | 0.0498 | 0.1248 | 0.0754 | 0.1018 | 0.0301   |
| 719 | 0.1778 | 0.1095 | 0.0494 | 0.1182 | 0.0723 | 0.0972 | 0.0205   |
| 720 | 0.1751 | 0.1075 | 0.048  | 0.1153 | 0.0705 | 0.0956 | 0.0176   |
| 721 | 0.1724 | 0.1055 | 0.0467 | 0.1124 | 0.0688 | 0.0939 | 0.0147   |
| 722 | 0.1693 | 0.1033 | 0.045  | 0.1099 | 0.0676 | 0.0915 | 0.014    |
| 723 | 0.1662 | 0.1012 | 0.0433 | 0.1074 | 0.0665 | 0.0892 | 0.0133   |
| 724 | 0.1604 | 0.0984 | 0.0419 | 0.1037 | 0.064  | 0.0866 | 0.0119   |
| 725 | 0.1573 | 0.0964 | 0.0413 | 0.101  | 0.0622 | 0.0846 | 0.0113   |
| 726 | 0.1541 | 0.0943 | 0.0408 | 0.0984 | 0.0605 | 0.0826 | 0.0108   |
| 727 | 0.1483 | 0.0914 | 0.0394 | 0.0943 | 0.0584 | 0.0802 | 0.0103   |
| 728 | 0.1455 | 0.0889 | 0.0385 | 0.0924 | 0.0578 | 0.079  | 0.0102   |
| 729 | 0.1426 | 0.0865 | 0.0377 | 0.0905 | 0.0573 | 0.0778 | 0.01     |
| 730 | 0.1381 | 0.084  | 0.0361 | 0.0862 | 0.0541 | 0.0749 | 8.73E-03 |
| 731 | 0.136  | 0.0829 | 0.0362 | 0.0849 | 0.053  | 0.0739 | 9.67E-03 |
| 732 | 0.1339 | 0.0819 | 0.0362 | 0.0836 | 0.0519 | 0.073  | 0.0106   |
| 733 | 0.1296 | 0.0803 | 0.0327 | 0.0816 | 0.05   | 0.0698 | 0.011    |
| 734 | 0.1272 | 0.0784 | 0.0316 | 0.0808 | 0.0494 | 0.0685 | 0.0112   |
| 735 | 0.1249 | 0.0765 | 0.0305 | 0.0801 | 0.0488 | 0.0671 | 0.0113   |
| 736 | 0.1202 | 0.0737 | 0.0335 | 0.078  | 0.047  | 0.0658 | 0.011    |
| 737 | 0.1185 | 0.0722 | 0.0362 | 0.0767 | 0.0464 | 0.0649 | 0.0108   |
| 738 | 0.1167 | 0.0707 | 0.031  | 0.0754 | 0.0458 | 0.0641 | 0.0107   |
| 739 | 0.1129 | 0.0681 | 0.0297 | 0.0742 | 0.0443 | 0.0636 | 0.0118   |
| 740 | 0.1113 | 0.068  | 0.0292 | 0.0731 | 0.0437 | 0.0622 | 0.011    |
| 741 | 0.1098 | 0.0678 | 0.0286 | 0.0719 | 0.0431 | 0.0607 | 0.0103   |
| 742 | 0.1074 | 0.0665 | 0.0261 | 0.0704 | 0.0422 | 0.0583 | 0.0115   |
| 743 | 0.1053 | 0.0653 | 0.0262 | 0.0703 | 0.0412 | 0.0574 | 0.0121   |
| 744 | 0.1033 | 0.064  | 0.0263 | 0.0702 | 0.0403 | 0.0566 | 0.0127   |
| 745 | 0.1012 | 0.0624 | 0.0268 | 0.0703 | 0.0397 | 0.0552 | 0.0126   |
| 746 | 0.0987 | 0.0607 | 0.0261 | 0.0691 | 0.0391 | 0.0548 | 0.0131   |
| 747 | 0.0962 | 0.0589 | 0.0255 | 0.0679 | 0.0386 | 0.0545 | 0.0135   |
| 748 | 0.0941 | 0.06   | 0.0265 | 0.0677 | 0.0378 | 0.0539 | 0.0112   |
| 749 | 0.0929 | 0.0583 | 0.025  | 0.0667 | 0.0374 | 0.0528 | 0.0112   |
| 750 | 0.0918 | 0.0566 | 0.0234 | 0.0658 | 0.037  | 0.0517 | 0.0111   |
| 751 | 0.0899 | 0.058  | 0.0231 | 0.0647 | 0.0358 | 0.0503 | 0.0124   |
| 752 | 0.0889 | 0.0569 | 0.022  | 0.0644 | 0.0347 | 0.0494 | 0.0125   |
| 753 | 0.0879 | 0.0557 | 0.0209 | 0.0641 | 0.0336 | 0.0485 | 0.0125   |
| 754 | 0.0855 | 0.0554 | 0.0228 | 0.0635 | 0.0329 | 0.0471 | 0.0109   |
| 755 | 0.0834 | 0.0546 | 0.024  | 0.0625 | 0.0326 | 0.0462 | 0.0117   |
| 756 | 0.0814 | 0.0538 | 0.0219 | 0.0616 | 0.0323 | 0.0453 | 0.0124   |
| 757 | 0.0803 | 0.0524 | 0.0228 | 0.0612 | 0.0331 | 0.0452 | 0.0118   |
| 758 | 0.0785 | 0.0508 | 0.0214 | 0.0597 | 0.0321 | 0.0444 | 0.012    |
| 759 | 0.0768 | 0.0493 | 0.02   | 0.0582 | 0.0311 | 0.0435 | 0.0122   |

|  |     |  |       |        |  |        |  |        |  |        |  |        |  |       |  |
|--|-----|--|-------|--------|--|--------|--|--------|--|--------|--|--------|--|-------|--|
|  | 760 |  | 0.076 | 0.0488 |  | 0.0182 |  | 0.0563 |  | 0.0292 |  | 0.0425 |  | 0.013 |  |
|--|-----|--|-------|--------|--|--------|--|--------|--|--------|--|--------|--|-------|--|

| TIME OF DAY |       | SALIVARY MELATONIN (PG/ML) UNDER EACH LIGHT SOURCE |       |       |       |       |       |       |       |       |       |       |       |       |      |     |  |  |  |
|-------------|-------|----------------------------------------------------|-------|-------|-------|-------|-------|-------|-------|-------|-------|-------|-------|-------|------|-----|--|--|--|
|             |       | LED A                                              |       | LED B |       | LED C |       | LED D |       | LED E |       | LED F |       | FLUOR |      |     |  |  |  |
| HR:MIN      | MEAN  | SEM                                                | MEAN  | SEM   | MEAN  | SEM   | MEAN  | SEM   | MEAN  | SEM   | MEAN  | SEM   | MEAN  | SEM   | MEAN | SEM |  |  |  |
| 20:00       | 0.27  | 0.06                                               | 0.38  | 0.06  | 0.40  | 0.09  | 0.97  | 0.40  | 0.47  | 0.10  | 0.74  | 0.31  | 1.64  | 0.68  | -    | -   |  |  |  |
| 20:30       | -     | -                                                  | 0.20  | 0.09  | 0.39  | 0.10  | 1.11  | 0.47  | 0.56  | 0.18  | 0.93  | 0.42  | -     | -     | -    | -   |  |  |  |
| 21:00       | 0.24  | 0.06                                               | 0.26  | 0.06  | 0.35  | 0.16  | 1.36  | 0.68  | 0.66  | 0.25  | 1.31  | 0.64  | 1.71  | 0.71  | -    | -   |  |  |  |
| 21:30       | -     | -                                                  | 0.36  | 0.09  | 0.37  | 0.12  | 1.74  | 0.81  | 0.95  | 0.42  | 1.88  | 0.80  | -     | -     | -    | -   |  |  |  |
| 22:00       | 0.29  | 0.07                                               | 0.26  | 0.06  | 0.27  | 0.10  | 2.02  | 0.82  | 1.18  | 0.48  | 2.35  | 0.89  | 1.61  | 0.75  | -    | -   |  |  |  |
| 22:30       | -     | -                                                  | 0.51  | 0.11  | 0.64  | 0.13  | 2.19  | 0.90  | 1.97  | 0.74  | 2.71  | 0.92  | -     | -     | -    | -   |  |  |  |
| 23:00       | 0.78  | 0.17                                               | 0.46  | 0.09  | 0.66  | 0.20  | 3.09  | 1.09  | 2.70  | 1.02  | 3.44  | 1.00  | 1.44  | 0.75  | -    | -   |  |  |  |
| 00:00       | 1.01  | 0.36                                               | 1.09  | 0.26  | 1.58  | 0.46  | 4.39  | 1.43  | 3.90  | 1.22  | 4.65  | 1.22  | 2.26  | 0.83  | -    | -   |  |  |  |
| 00:30       | -     | -                                                  | 1.45  | 0.44  | 1.65  | 0.58  | 4.10  | 1.10  | 4.78  | 1.22  | 5.38  | 1.19  | -     | -     | -    | -   |  |  |  |
| 01:00       | 1.09  | 0.35                                               | 1.92  | 0.61  | 1.83  | 0.65  | 4.57  | 1.12  | 5.11  | 1.37  | 6.22  | 1.52  | 2.53  | 1.03  | -    | -   |  |  |  |
| 01:30       | -     | -                                                  | 2.13  | 0.64  | 2.29  | 0.85  | 4.48  | 1.07  | 5.80  | 1.54  | 6.27  | 1.33  | -     | -     | -    | -   |  |  |  |
| 02:00       | 1.09  | 0.25                                               | 2.63  | 0.98  | 2.68  | 0.96  | 5.07  | 1.20  | 5.90  | 1.55  | 6.69  | 1.40  | 3.22  | 1.16  | -    | -   |  |  |  |
| 02:30       | -     | -                                                  | 4.14  | 1.49  | 3.50  | 1.03  | 5.06  | 1.14  | 6.74  | 1.70  | 7.79  | 1.64  | -     | -     | -    | -   |  |  |  |
| 03:00       | 1.66  | 0.39                                               | 4.14  | 1.51  | 4.09  | 1.33  | 5.12  | 1.11  | 7.02  | 1.67  | 8.66  | 1.81  | 3.77  | 1.29  | -    | -   |  |  |  |
| 03:30       | -     | -                                                  | 4.67  | 1.76  | 4.44  | 1.51  | 4.88  | 1.17  | 6.42  | 1.59  | 9.46  | 2.14  | -     | -     | -    | -   |  |  |  |
| 04:00       | 1.56  | 0.41                                               | 5.48  | 2.11  | 4.91  | 1.63  | 5.17  | 1.21  | 6.83  | 1.61  | 9.17  | 2.16  | 5.01  | 1.64  | -    | -   |  |  |  |
| 04:30       | -     | -                                                  | 6.38  | 2.41  | 6.47  | 2.06  | 6.25  | 1.35  | 7.54  | 1.76  | 9.21  | 2.15  | -     | -     | -    | -   |  |  |  |
| 05:00       | 1.44  | 0.37                                               | 7.44  | 2.82  | 6.00  | 2.00  | 5.80  | 1.38  | 7.11  | 1.56  | 8.61  | 2.18  | 5.13  | 1.73  | -    | -   |  |  |  |
| 05:30       | -     | -                                                  | 6.52  | 2.44  | 7.09  | 2.09  | 5.53  | 1.36  | 6.96  | 1.63  | 7.79  | 2.06  | -     | -     | -    | -   |  |  |  |
| 06:00       | 0.93  | 0.30                                               | 7.22  | 2.87  | 7.23  | 2.30  | 5.20  | 1.30  | 6.42  | 1.44  | 6.90  | 1.81  | 3.94  | 1.55  | -    | -   |  |  |  |
| 06:30       | -     | -                                                  | 6.78  | 2.66  | 7.80  | 2.31  | -     | -     | -     | -     | -     | -     | -     | -     | -    | -   |  |  |  |
| 07:00       | 0.70  | 0.23                                               | 6.00  | 2.46  | 6.49  | 1.99  | 2.63  | 0.60  | 4.52  | 1.13  | 4.41  | 1.10  | 4.19  | 2.15  | -    | -   |  |  |  |
| 08:00       | 0.49  | 0.12                                               | 2.90  | 1.04  | 3.61  | 1.01  | 1.69  | 0.35  | 2.04  | 0.50  | 2.57  | 0.56  | 2.75  | 1.22  | -    | -   |  |  |  |
| AUC Mean    | 11.18 |                                                    | 38.44 |       | 39.45 |       | 45.46 |       | 53.19 |       | 64.34 |       | 37.00 |       |      |     |  |  |  |
| AUC SEM     | 2.23  |                                                    | 12.59 |       | 10.87 |       | 10.46 |       | 11.40 |       | 13.38 |       | 13.14 |       |      |     |  |  |  |

**Suppl Table 2. Salivary melatonin mean and SEM values at each sampling interval during exposure from 2000h to 0800h under each of the six white LED light sources (A, B, C, D, E, F) and the fluorescent light used in the study (Top), and the mean and SEM melatonin Area under the Curve (AUC) from the subjects exposed to each light source (Bottom).**
